# Supplementary material for: Osteoporosis Is Characterized by Altered Expression of Exosomal Long Non-coding RNAs
Source: Front Genet. 2020 Nov 12;11:566959. doi: 10.3389/fgene.2020.566959 (PMC7689021; doi:10.3389/fgene.2020.566959)
Supplement: Supplementary Table 3 — GO analysis of up regulated genes targeted by differentially expressed lncRNAs. [file Table_3.XLSX]

## Sheet: DE_lncRNA_up_gene_GO_enrich_res
ID	Description	GeneRatio	BgRatio	pvalue	p.adjust	qvalue	geneID	Count
GO:0032259	biological_process methylation	27/1227	211/21724	6.13605e-05	0.159046	0.156049	ENSG00000066651/ENSG00000100483/ENSG00000105202/ENSG00000110851/ENSG00000111641/ENSG00000124713/ENSG00000126749/ENSG00000135632/ENSG00000143379/ENSG00000145020/ENSG00000146476/ENSG00000146834/ENSG00000148834/ENSG00000151224/ENSG00000164603/ENSG00000168806/ENSG00000168906/ENSG00000169519/ENSG00000171806/ENSG00000183955/ENSG00000203791/ENSG00000204371/ENSG00000206562/ENSG00000214756/ENSG00000258539…	27
GO:0070475	biological_process rRNA base methylation	4/1227	6/21724	0.000138583	0.179603	0.176219	ENSG00000111641/ENSG00000126749/ENSG00000169519/ENSG00000268439	4
GO:0046676	biological_process negative regulation of insulin secretion	7/1227	30/21724	0.00116494	0.275416	0.270226	ENSG00000049247/ENSG00000102362/ENSG00000113231/ENSG00000141959/ENSG00000157017/ENSG00000158445/ENSG00000179295	7
GO:0015031	biological_process protein transport	58/1227	681/21724	0.00121694	0.275416	0.270226	ENSG00000013364/ENSG00000046653/ENSG00000049245/ENSG00000069248/ENSG00000077044/ENSG00000085978/ENSG00000101888/ENSG00000105647/ENSG00000105649/ENSG00000107862/ENSG00000108961/ENSG00000109762/ENSG00000110697/ENSG00000111481/ENSG00000111737/ENSG00000118640/ENSG00000120725/ENSG00000121621/ENSG00000122218/ENSG00000123595/ENSG00000125124/ENSG00000125633/ENSG00000127328/ENSG00000129083/ENSG00000130724…	58
GO:0000187	biological_process activation of MAPK activity	16/1227	123/21724	0.00153418	0.275416	0.270226	ENSG00000008294/ENSG00000055208/ENSG00000102882/ENSG00000106804/ENSG00000110514/ENSG00000134070/ENSG00000138685/ENSG00000139318/ENSG00000157017/ENSG00000162188/ENSG00000171094/ENSG00000173327/ENSG00000173432/ENSG00000175104/ENSG00000179295/ENSG00000269335	16
GO:0071248	biological_process cellular response to metal ion	3/1227	5/21724	0.00164915	0.275416	0.270226	ENSG00000070404/ENSG00000131183/ENSG00000147465	3
GO:0061621	biological_process canonical glycolysis	6/1227	26/21724	0.00278026	0.275416	0.270226	ENSG00000111640/ENSG00000111669/ENSG00000111674/ENSG00000136872/ENSG00000141959/ENSG00000149925	6
GO:0016340	biological_process calcium-dependent cell-matrix adhesion	2/1227	2/21724	0.00318769	0.275416	0.270226	ENSG00000092439/ENSG00000173402	2
GO:1903672	biological_process positive regulation of sprouting angiogenesis	4/1227	12/21724	0.00347701	0.286109	0.280717	ENSG00000138685/ENSG00000157017/ENSG00000161638/ENSG00000284453	4
GO:0006641	biological_process triglyceride metabolic process	7/1227	38/21724	0.00487203	0.352104	0.345469	ENSG00000068366/ENSG00000121691/ENSG00000125629/ENSG00000158669/ENSG00000169174/ENSG00000179295/ENSG00000233276	7
