# Supplementary material for: Osteoporosis Is Characterized by Altered Expression of Exosomal Long Non-coding RNAs
Source: Front Genet. 2020 Nov 12;11:566959. doi: 10.3389/fgene.2020.566959 (PMC7689021; doi:10.3389/fgene.2020.566959)
Supplement: Supplementary Table 4 — GO analysis of down regulated genes targeted by differentially expressed lncRNAs. [file Table_4.XLSX]

## Sheet: DE_lncRNA_down_gene_GO_enrich_r
ID	Description	GeneRatio	BgRatio	pvalue	p.adjust	qvalue	geneID	Count
GO:0036065	biological_process fucosylation	3/128	13/21724	5.47302e-05	0.00510086	0.00376198	ENSG00000174951/ENSG00000176920/ENSG00000180549	3
GO:0006508	biological_process proteolysis	15/128	809/21724	8.53131e-05	0.00662598	0.00488679	ENSG00000101557/ENSG00000122194/ENSG00000176978/ENSG00000198670/ENSG00000223569/ENSG00000227551/ENSG00000231396/ENSG00000232399/ENSG00000233136/ENSG00000248920/ENSG00000248933/ENSG00000249104/ENSG00000249811/ENSG00000250745/ENSG00000250844	15
GO:0021517	biological_process ventral spinal cord development	2/128	6/21724	0.000508767	0.0278924	0.0205712	ENSG00000114861/ENSG00000173406	2
GO:0060766	biological_process negative regulation of androgen receptor signaling pathway	2/128	12/21724	0.00218729	0.08622	0.063589	ENSG00000078043/ENSG00000114861	2
GO:0030521	biological_process androgen receptor signaling pathway	3/128	50/21724	0.00319973	0.08622	0.063589	ENSG00000067113/ENSG00000078043/ENSG00000180182	3
GO:0030518	biological_process intracellular steroid hormone receptor signaling pathway	2/128	17/21724	0.00442112	0.08622	0.063589	ENSG00000067113/ENSG00000180182	2
GO:0016266	biological_process O-glycan processing	3/128	62/21724	0.00586606	0.08622	0.063589	ENSG00000169876/ENSG00000169894/ENSG00000205277	3
GO:0006551	biological_process leucine metabolic process	1/128	1/21724	0.0058921	0.08622	0.063589	ENSG00000105552	1
